# Supplementary material for: IFN-κ is critical for normal wound repair and is decreased in diabetic wounds
Source: JCI Insight. 2022 May 9;7(9):e152765. doi: 10.1172/jci.insight.152765 (PMC9090246; doi:10.1172/jci.insight.152765)
Supplement: Supplemental data [file jciinsight-7-152765-s008.pdf]

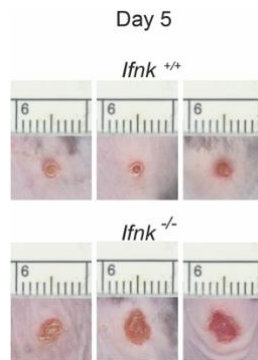

**Supplemental Figure 1: Deletion of IFN $\kappa$  impairs normal tissue repair.** 4mm punch biopsy wounds were created on *Ifnk*<sup>+/+</sup> and *Ifnk*<sup>-/-</sup> mice (2 wounds per mouse, 5 mice per group). Three representative photographs of the wounds were taken on day 5.

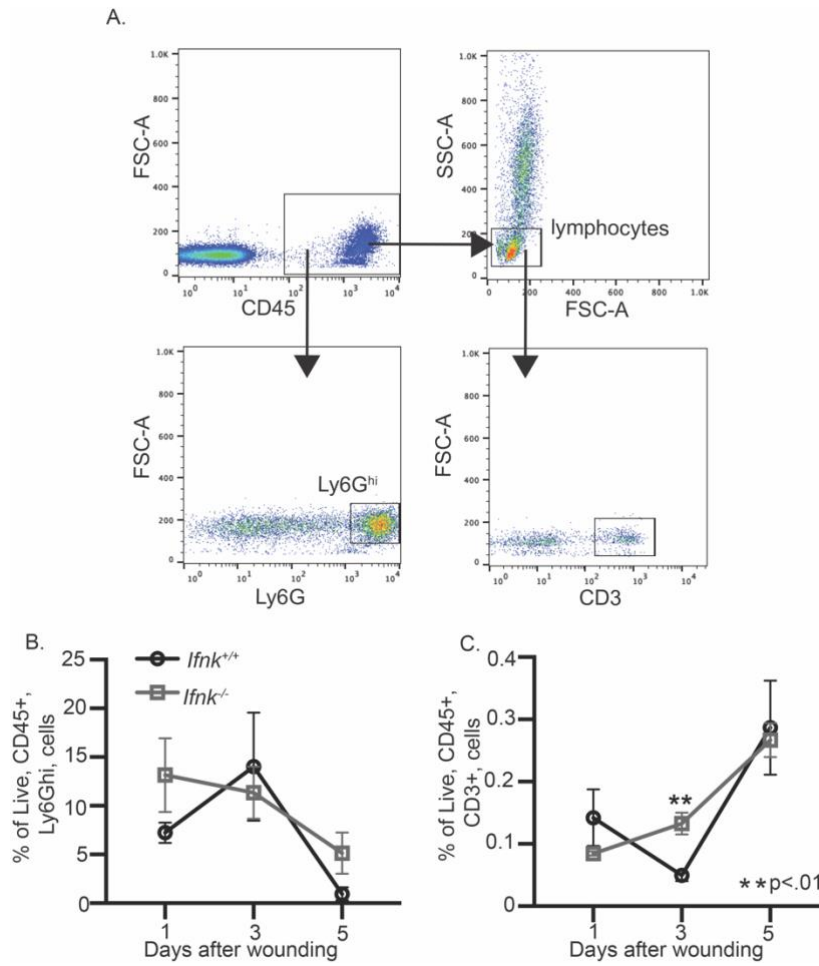

**Supplemental Figure 2: IFN $\kappa$  regulates T cells during normal tissue repair.** (A). IFN $\kappa$  KO and WT wound cell isolates were processed for flow cytometry using the following gating strategy selecting for neutrophils (live, CD45<sup>+</sup>, Ly6G<sup>hi</sup>) or T cells (live, CD45<sup>+</sup>, CD3<sup>+</sup>). (B). Flow cytometry quantification of neutrophils in wounds (n = 4-6 per group). (C) Flow cytometry quantification of T cells in wounds (n = 4-6 per group). Data were analyzed for variances, and 2-tailed student t-test was performed. \*\*p < 0.01. Data are presented as mean and SEM.

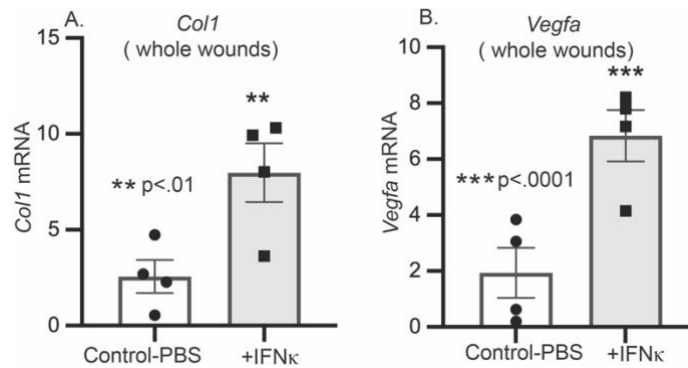

**Supplemental Figure 3: IFN $\kappa$  induces *Col1* and *Vegf* expression in wounds.** (A and B) Wounds isolated from IFN $\kappa$  and PBS control mice, n=4 per group. Gene expression of *Col1* and *Vegfa* was measured via qPCR. Data were analyzed for variances, and 2- tailed student t-test was performed. \*\*p < 0.01 and \*\*\*p < 0.001. Data are presented as mean and SEM.

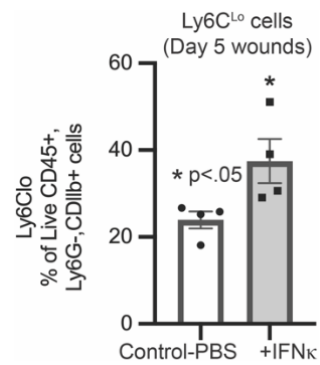

**Supplemental Figure 4: Ly6C<sup>Lo</sup> macrophage/monocyte increased following IFN $\kappa$  rescue in DIO mice.** (A and B) Wounds isolated from IFN $\kappa$  and PBS control mice, n=4 per group. Flow cytometry quantification of Ly6C<sup>Lo</sup> cells in wounds (n = 4 per group). \*p < 0.05. Data are presented as mean and SEM.
